# Supplementary material
Source: Royal Society of Chemistry journal article supplement (doi:10.1039/d5ta10513g)
Supplement: d5ta10513g1.pdf [file d5ta10513g1.pdf]

## **An ultrathin carbon-shelled indium oxide catalyst for electroreduction of CO<sub>2</sub> to formate at ampere-level current density**

Jiong-Qing Gao, Hao-Lin Zhu\*, Pei-Qin Liao\*, Xiao-Ming Chen

## Supplementary Index

### Experimental details

**Figure S1** Structure and characterization of  $[\text{In}_2(\text{HIDC})_2(\text{IDC})_2]$ .

**Figure S2** XPS spectra of  $\text{In}_2\text{O}_3@\text{C}$  before and after electrolysis.

**Figure S3**  $^1\text{H}$  NMR of hydrochloric acid after as-synthesized  $\text{In}_2\text{O}_3@\text{C}$  immersion.

**Figure S4** SEM image of  $\text{In}_2\text{O}_3@\text{C}$ .

**Figure S5** TEM image of  $\text{In}_2\text{O}_3@\text{C}$ .

**Figure S6** Cdl test of  $\text{In}_2\text{O}_3$  and  $\text{In}_2\text{O}_3@\text{C}$ .

**Figure S7**  $^1\text{H}$  NMR spectra of standard samples.

**Figure S8** Chronopotentiometry curves of  $\text{In}_2\text{O}_3@\text{C}$ .

**Figure S9**  $^1\text{H}$  NMR spectra of liquid products for  $\text{eCO}_2\text{RR}$  by  $\text{In}_2\text{O}_3@\text{C}$  catalyst.

**Figure S10** Chronopotentiometry curves of commercial  $\text{In}_2\text{O}_3$ .

**Figure S11**  $^1\text{H}$  NMR spectra of liquid products for  $\text{eCO}_2\text{RR}$  by commercial  $\text{In}_2\text{O}_3$ .

**Figure S12** FE(formate) of commercial  $\text{In}_2\text{O}_3$ .

**Figure S13** EIS test of  $\text{In}_2\text{O}_3$  and  $\text{In}_2\text{O}_3@\text{C}$ .

**Figure S14** PXRD patterns of  $\text{In}_2\text{O}_3@\text{C}$  catalyst before and after electrocatalysis.

**Figure S15** PXRD patterns of commercial  $\text{In}_2\text{O}_3$  catalyst before and after electrocatalysis.

**Figure S16**  $^1\text{H}$  NMR spectra of liquid products for  $\text{eCO}_2\text{RR}$  by  $\text{In}_2\text{O}_3@\text{C}$  catalyst under  $^{13}\text{CO}_2$ .

**Figure S17** Differential charge density mapping of the  $^*\text{OCHO}$  intermediate.

**Table S1.** Performance comparison of electrocatalytic formate synthesis.

**Table S2.** ICP-AES test of electrolyte.

### References

## Experimental details

### Materials and Measurements

All reagents and solvents in this work were commercially available and used without further purification. Piperazine and  $\text{InCl}_3$  were purchased from Macklin, while 4,5-imidazoledicarboxylic acid was purchased from Aladdin. Power X-ray diffraction (PXRD) patterns were collected on a Miniflex 600 Advance diffractometer ( $\text{Cu } K\alpha$ ). Scanning electron microscopy (SEM) images were recorded by a SU8010. Transmission electron microscope (TEM) images were recorded by a TEM (JEM-ARM200P) working at 200 kV. X-ray photoelectron spectroscopy (XPS) measurements were performed on an ESCALAB 250 instrument. Attenuated total reflection Fourier transform infrared spectroscopy (ATR-FTIR) experiments were performed on a Nicolet iS50 (Thermo Fisher) spectrometer.  $^1\text{H}$  nuclear magnetic resonance ( $^1\text{H}$  NMR) spectroscopy measurements were performed on a Bruker AVANCE-400 MHz spectrometer.

### ***Operando* attenuated total reflection Fourier transform infrared spectroscopy (ATR-FTIR) measurements**

*Operando* ATR-FTIR spectra were recorded on a Nicolet iS50 FTIR Thermo Fisher spectrometer. Firstly, 30  $\mu\text{L}$  of sample ink was coated on a glass carbon electrode ( $0.5 \text{ cm}^2$ ) and naturally dried to prepare the electrode, which is pressed on a germanium crystal in a special electrolytic cell by using a spiral micrometer for infrared signal capture. Then 7 mL of 0.1 M  $\text{KHCO}_3$  solution was added into the cell. The data were collected at  $-1.1 \text{ V}$  vs. RHE with an  $\text{Ag}/\text{AgCl}$  reference electrode and a platinum wire electrode after purging with high purity  $\text{CO}_2$  gas for 20 min, and the FTIR spectra were recorded manually at different time in a 20-minute duration.

**Density functional theory (DFT) calculations** were performed by the Materials Studio 5.5 package. The structures of all intermediates in electrocatalysis were firstly optimized by Dmol<sup>3</sup> module, and the energies were obtained by calculating frequency. The generalized gradient approximation (GGA) with the Perdew-Burke-Ernzerhof (PBE) function and TS for DFT-D correction were employed to the calculation. The convergence tolerance of energy, force and displacement convergence were set as  $1 \times 10^{-5} \text{ Ha}$ ,  $2 \times 10^{-3} \text{ Ha}$  and  $5 \times 10^{-3} \text{ \AA}$ , respectively. The core was treated using the effective core potential (ECP), and the electrons were treated by double numerical plus *d*-functions (DNP) basis set.

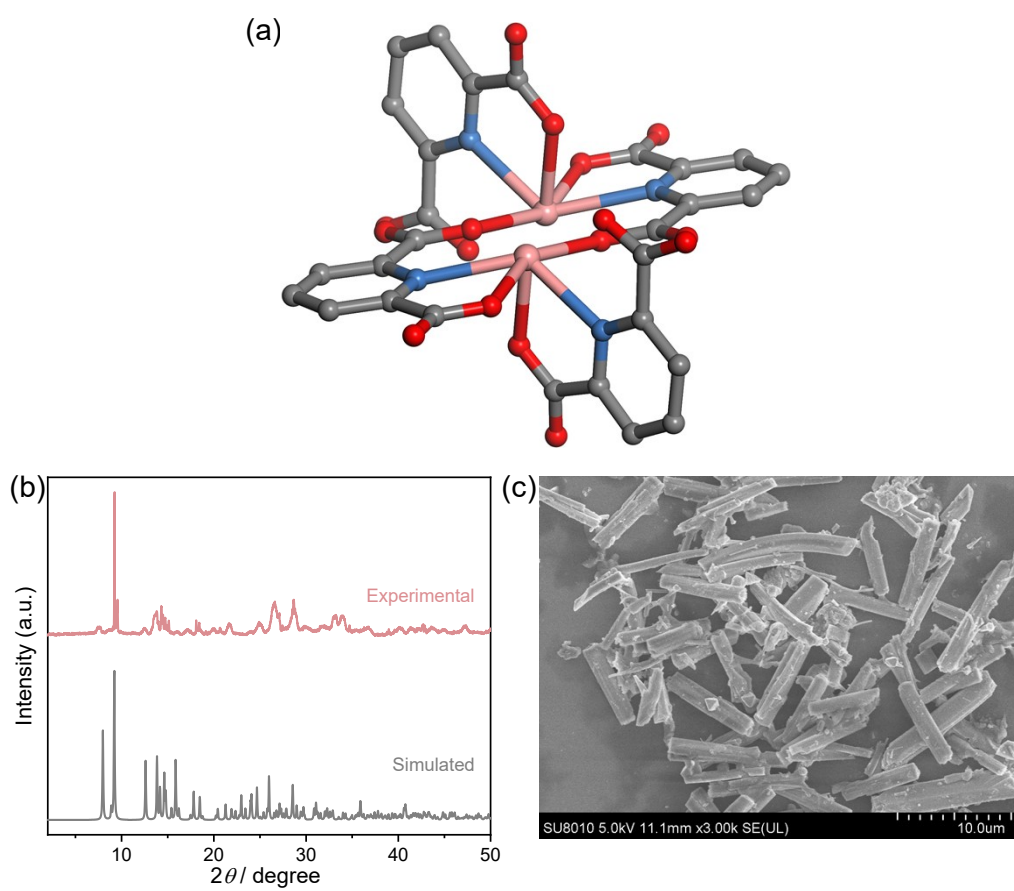

**Figure S1.** (a) Molecular structure, (b) PXRD patterns, and (c) SEM image of  $[\text{In}_2(\text{HIDC})_2(\text{IDC})_2]$ .

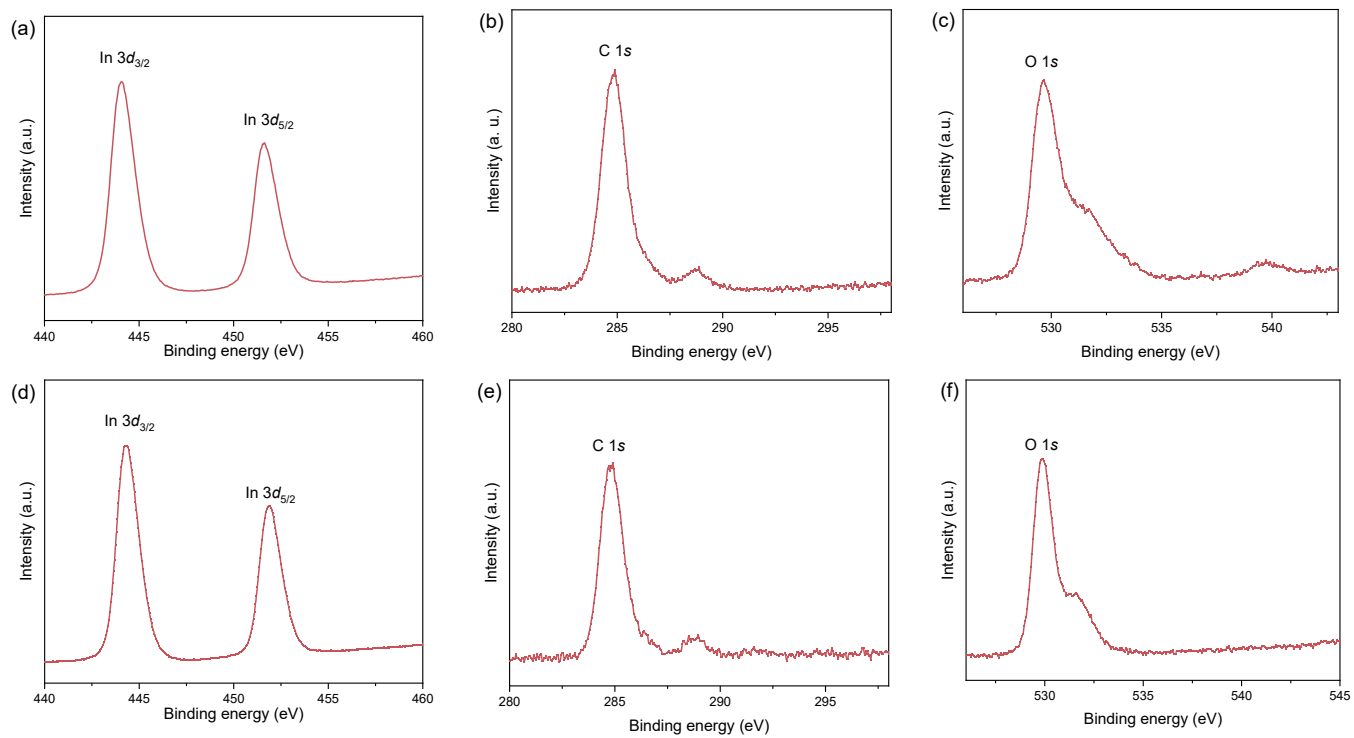

**Figure S2.** In 3d XPS spectrum of  $\text{In}_2\text{O}_3@\text{C}$  (a-c) before and (d-e) after electrolysis.

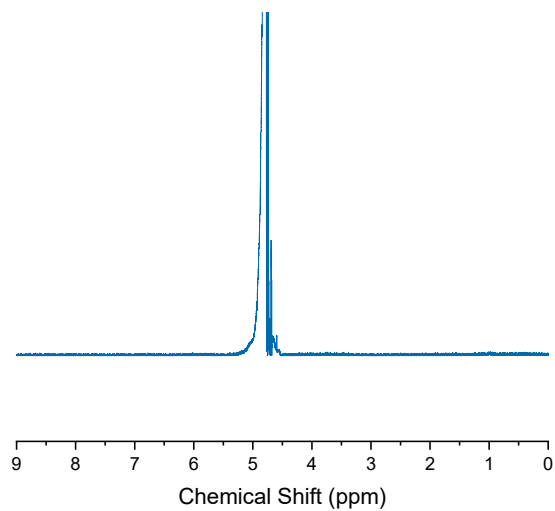

**Figure S3.**  $^1\text{H}$  NMR of hydrochloric acid after as-synthesized  $\text{In}_2\text{O}_3@\text{C}$  immersion.

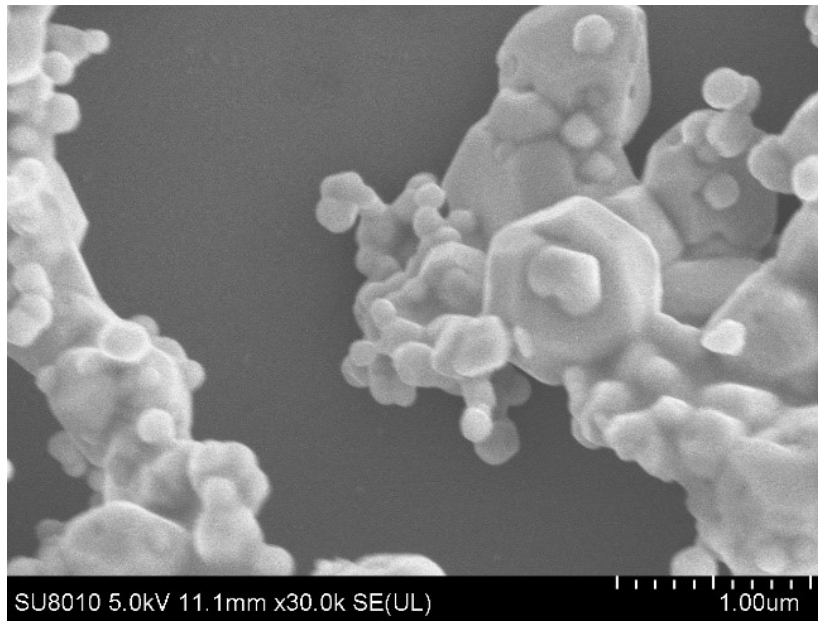

**Figure S4.** SEM image of In<sub>2</sub>O<sub>3</sub>@C.

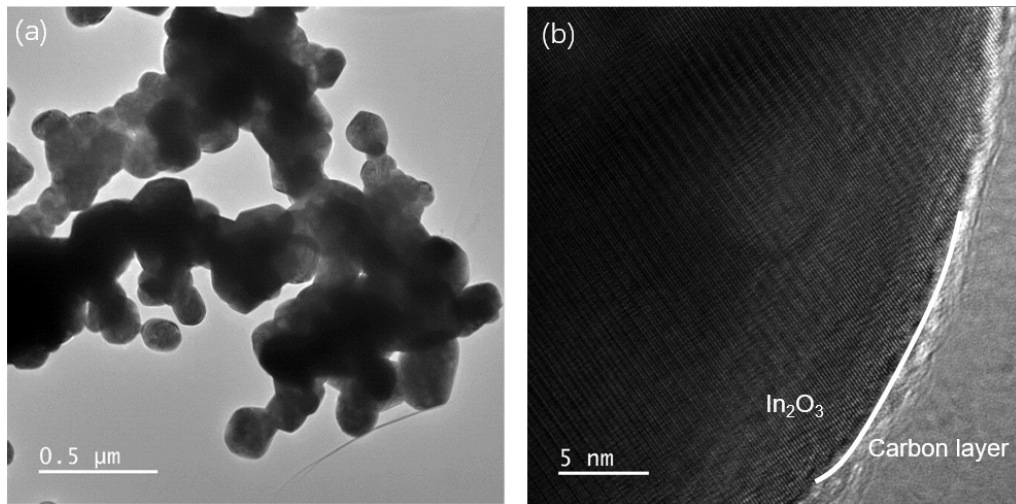

**Figure S5.** TEM image of In<sub>2</sub>O<sub>3</sub>@C before(a) and after(b) electrolysis.

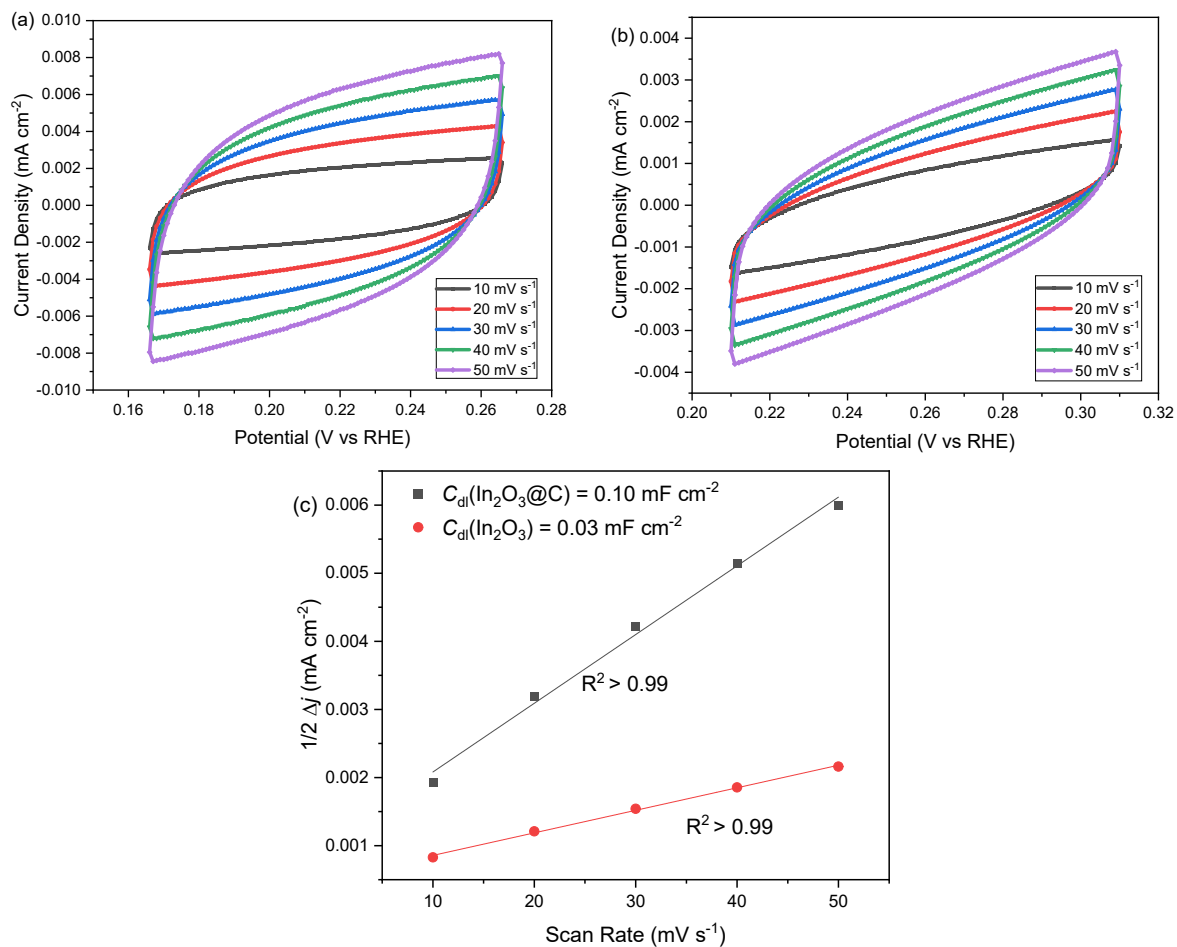

**Figure S6** Cyclic Voltammetry (CV) curves of (a)  $\text{In}_2\text{O}_3@\text{C}$  and (b)  $\text{In}_2\text{O}_3$ , respectively. Double-layer capacitance(c) obtained by linear fitting of CV.

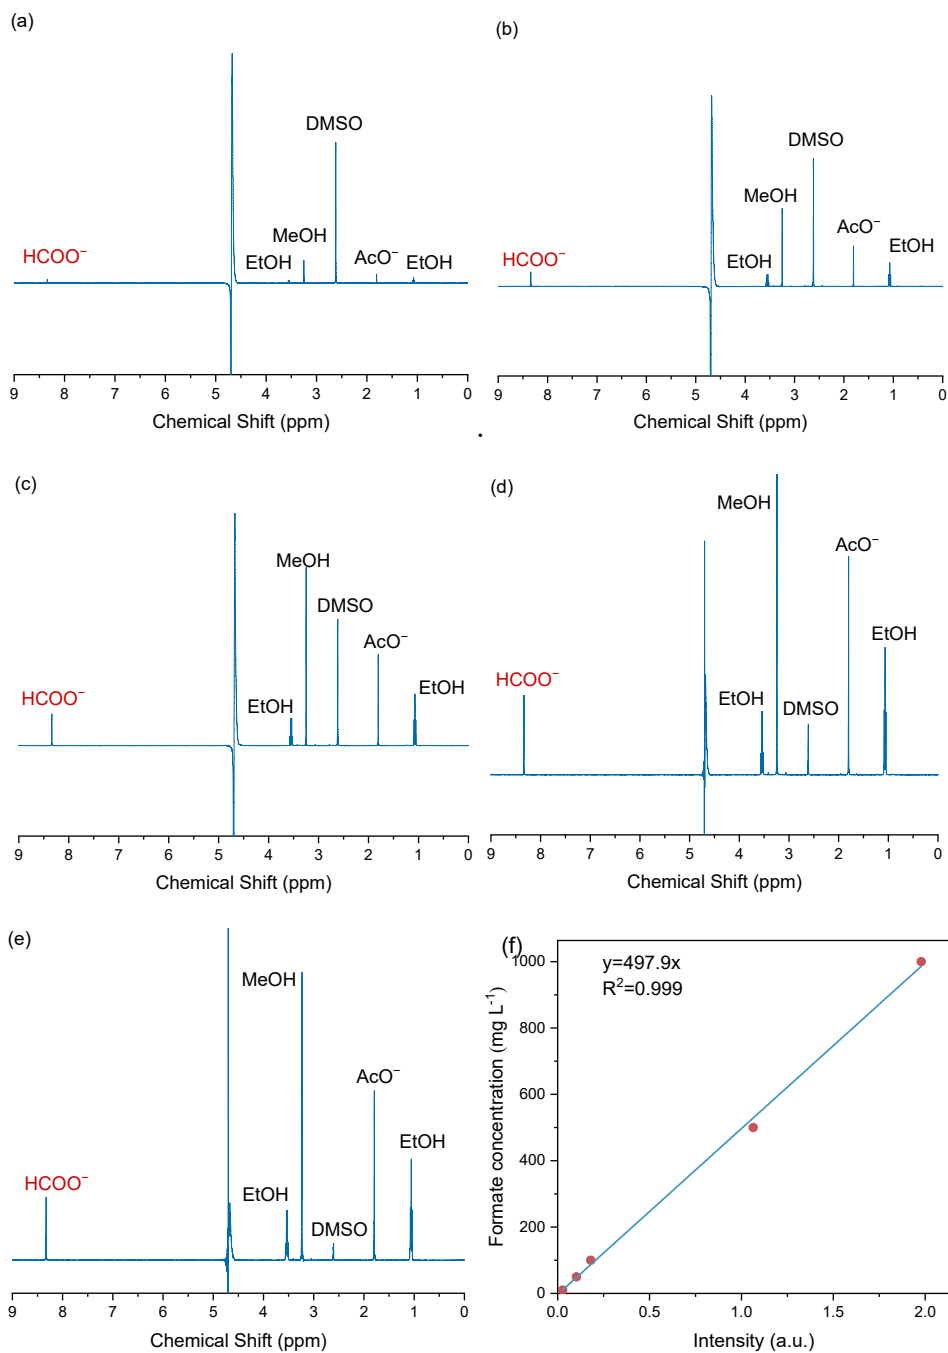

**Figure S7.**  $^1\text{H}$  NMR spectra of formate standard solutions with different concentrations of (a) 10, (b) 50, (c) 100, and (d) 500 (e) 1000  $\text{mg L}^{-1}$ . (f) Calibration curve of standard solutions for the determination of formate.

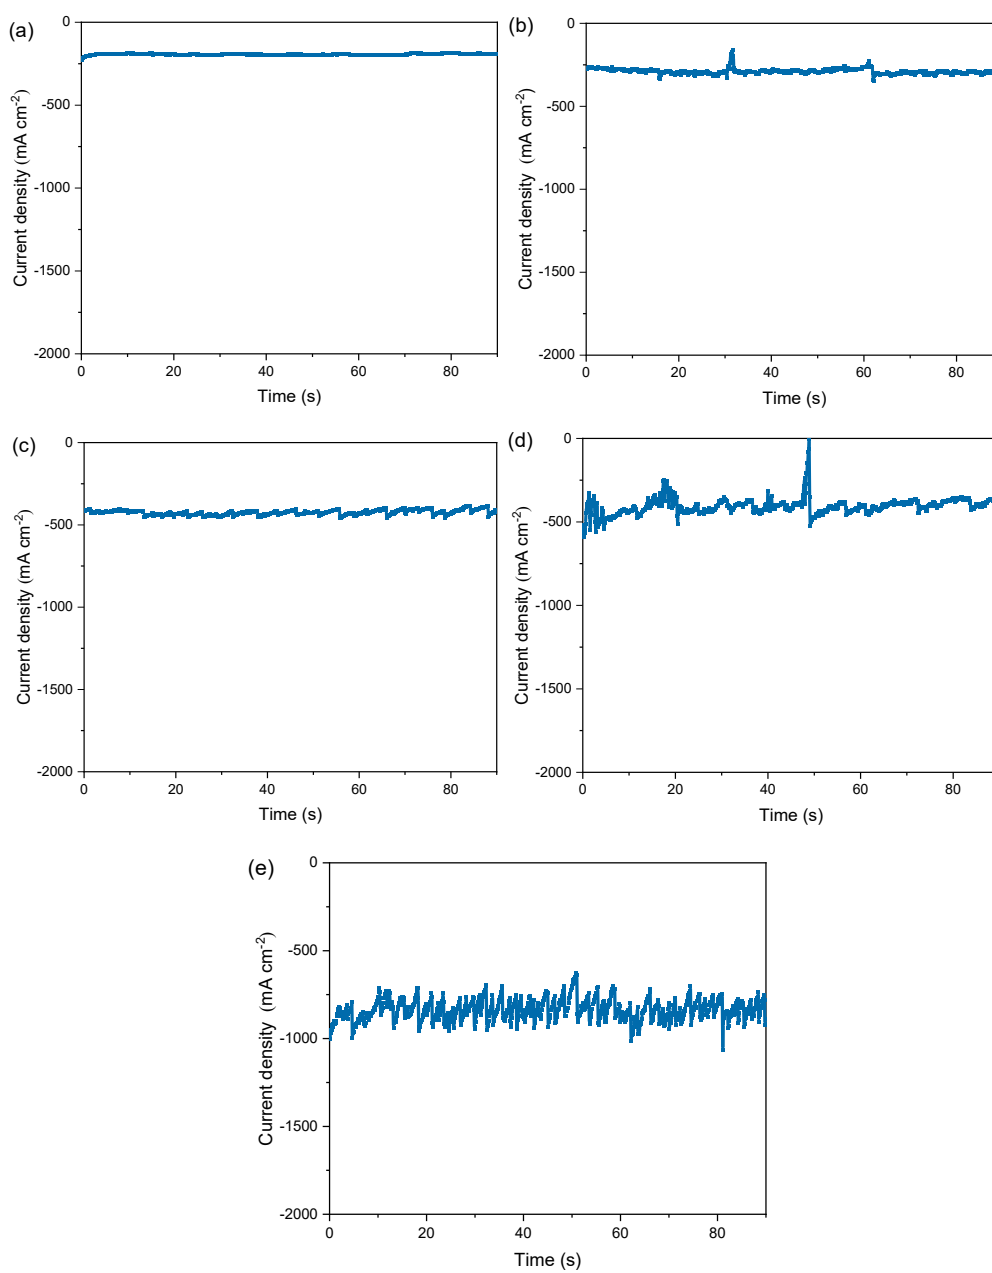

**Figure S8.** Chronopotentiometry test of In<sub>2</sub>O<sub>3</sub>@C at the potentials of (a) -1.1 V vs. RHE, (b) -1.3 V vs. RHE, (c) -1.5 V vs. RHE, (d) -1.7 V vs. RHE (e) -1.9 V vs. RHE.

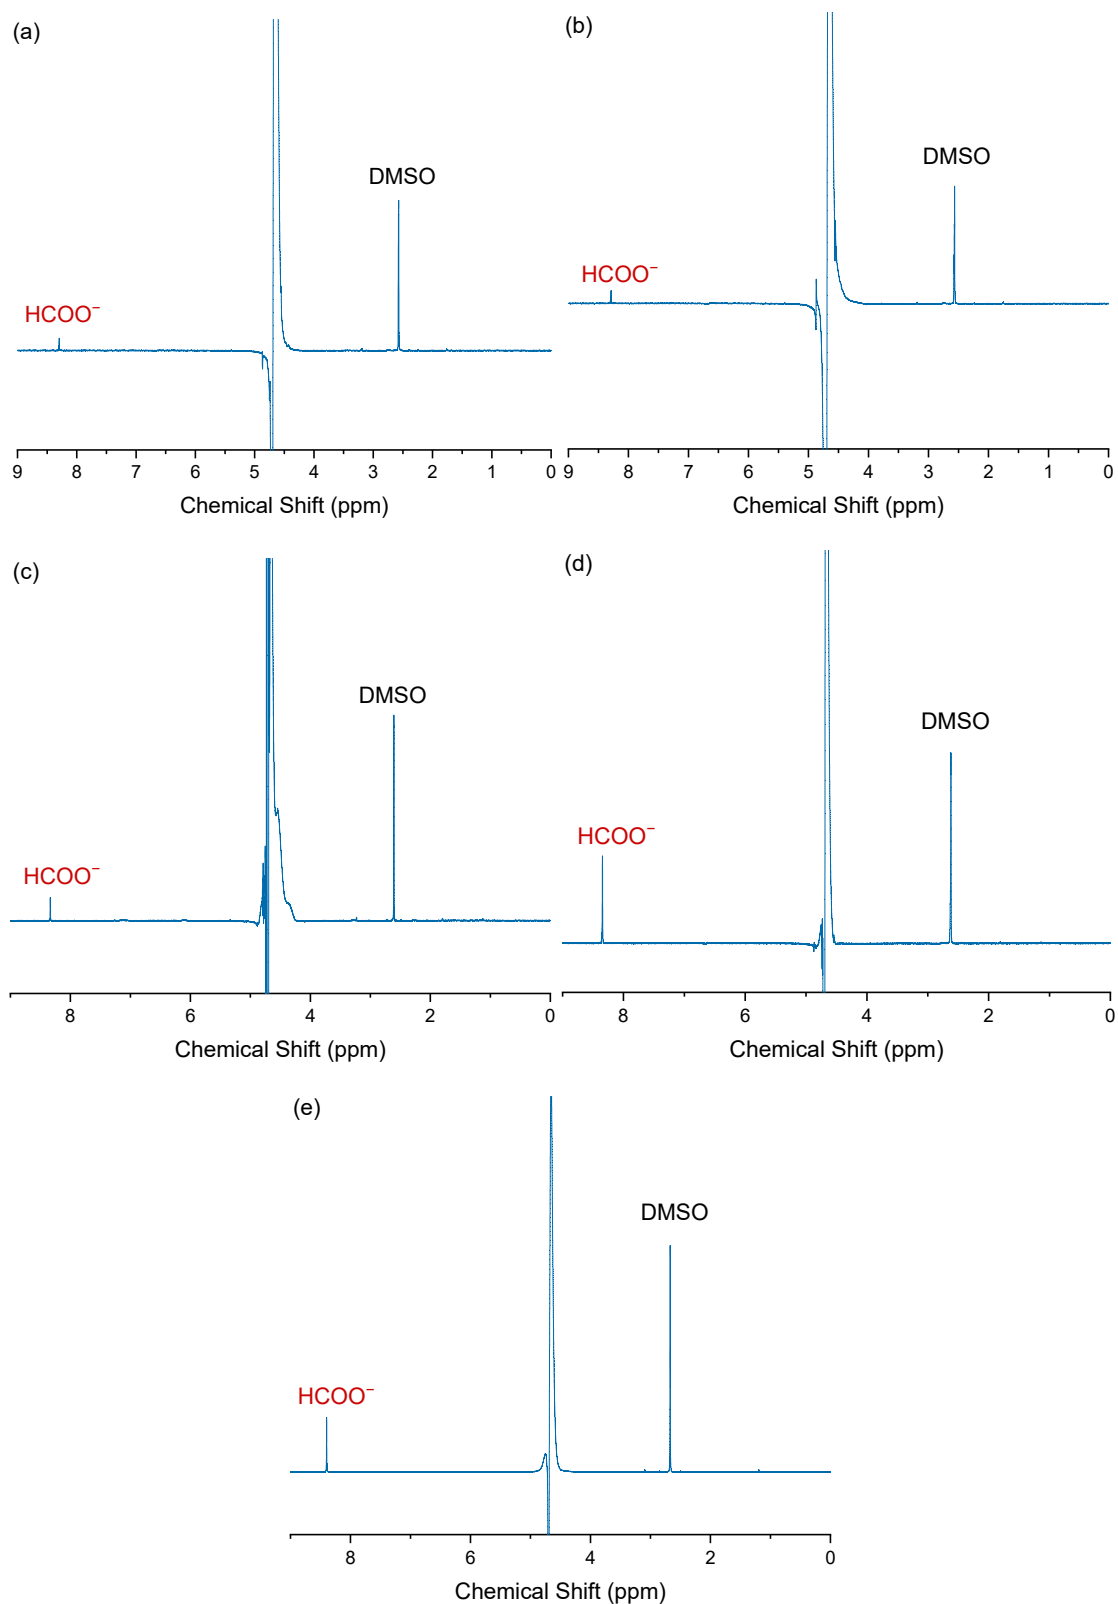

**Figure S9.**  $^1\text{H}$  NMR spectra of liquid products for  $\text{eCO}_2\text{RR}$  by  $\text{In}_2\text{O}_3@\text{C}$  catalyst at the potentials of (a)  $-1.1$  V vs. RHE, (b)  $-1.3$  V vs. RHE, (c)  $-1.5$  V vs. RHE, (d)  $-1.7$  V vs. RHE (e)  $-1.9$  V vs. RHE.

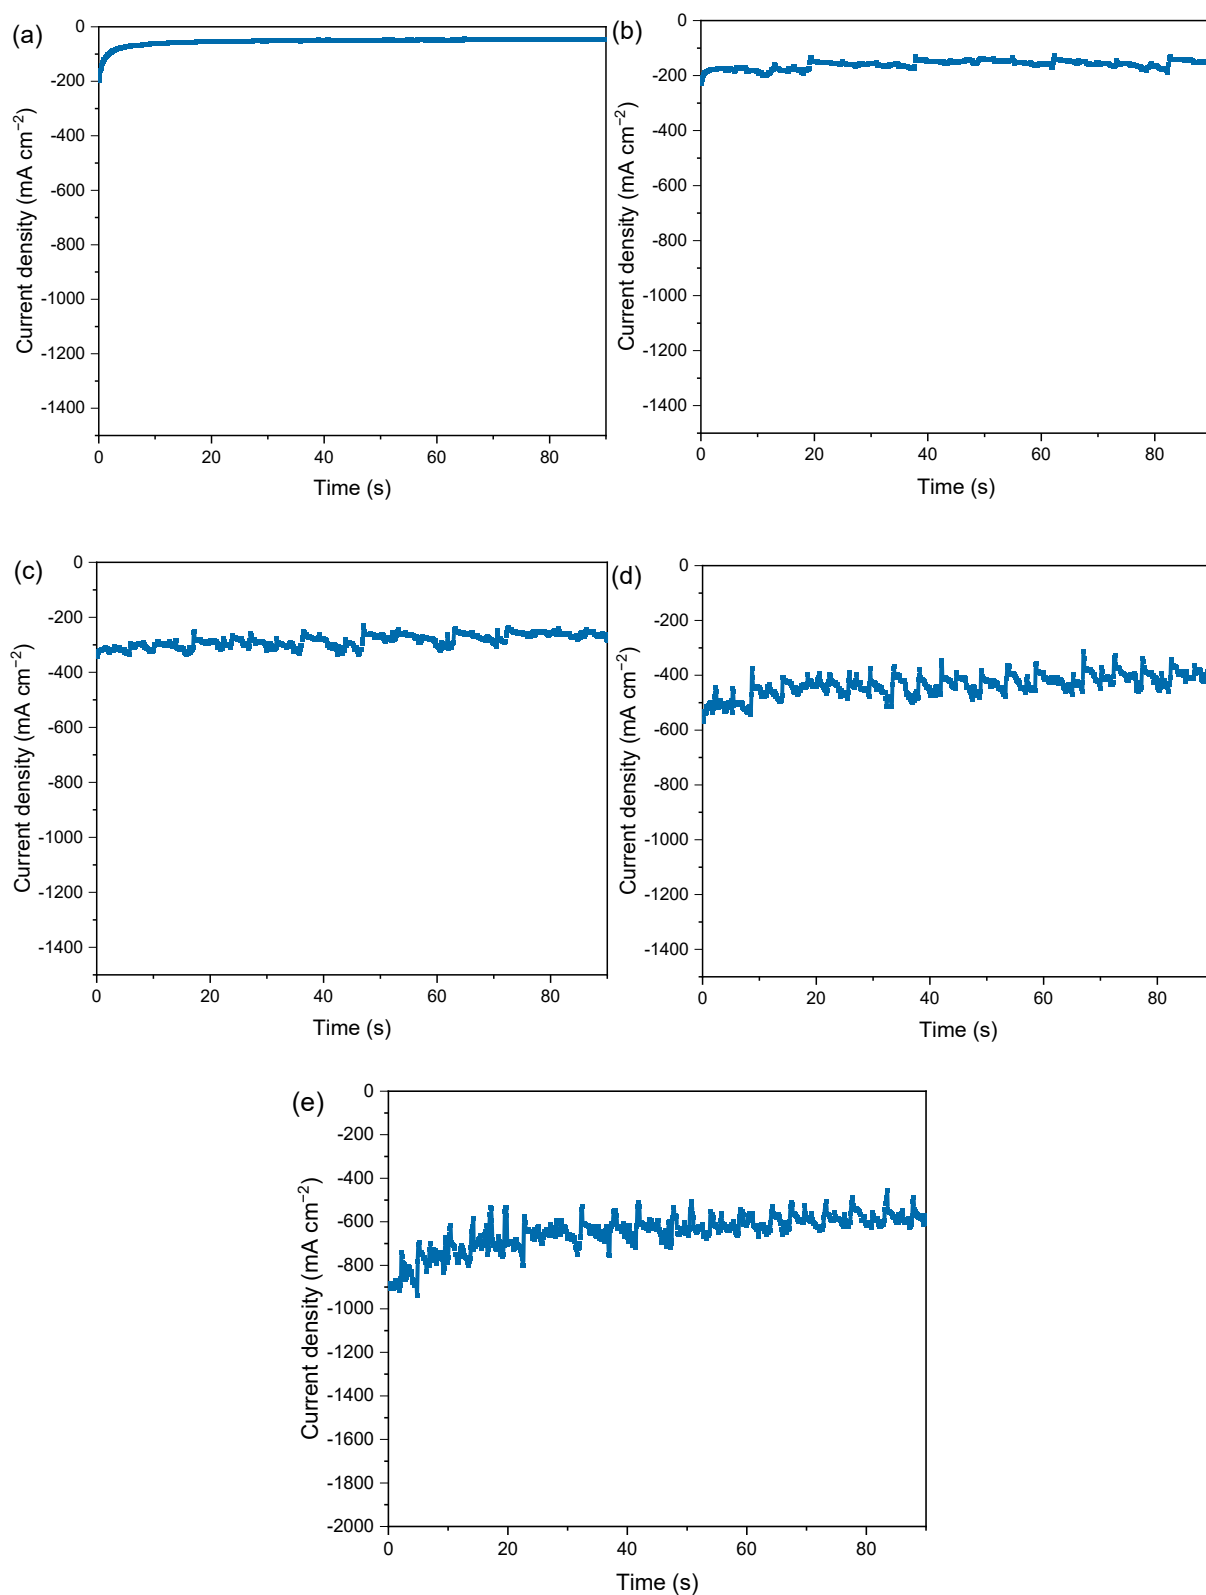

**Figure S10.** Chronopotentiometry test of commercial In<sub>2</sub>O<sub>3</sub> at the potentials of (a) -1.1 V vs. RHE, (b) -1.3 V vs. RHE, (c) -1.5 V vs. RHE, (d) -1.7 V vs. RHE (e) -1.9 V vs. RHE.

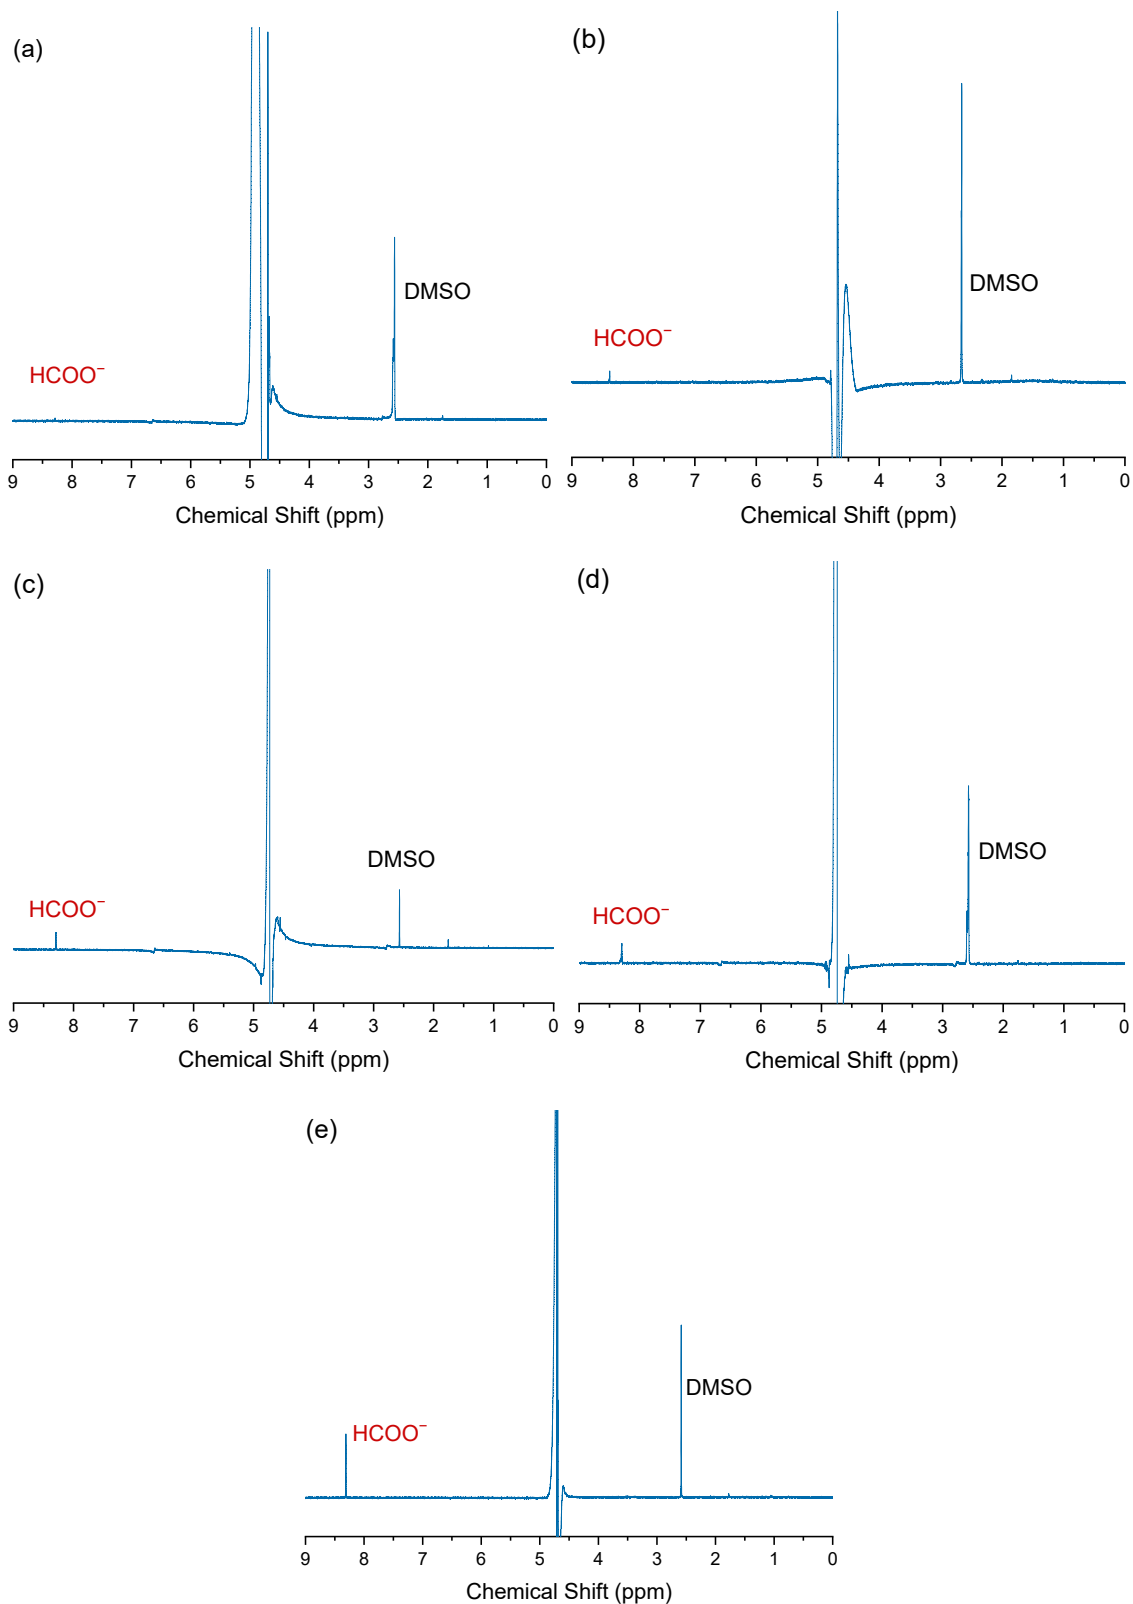

**Figure S11.**  $^1\text{H}$  NMR spectra of liquid products for  $\text{eCO}_2\text{RR}$  by commercial  $\text{In}_2\text{O}_3$  at the potentials of (a)  $-1.1$  V vs. RHE, (b)  $-1.3$  V vs. RHE, (c)  $-1.5$  V vs. RHE, (d)  $-1.7$  V vs. RHE (e)  $-1.9$  V vs. RHE.

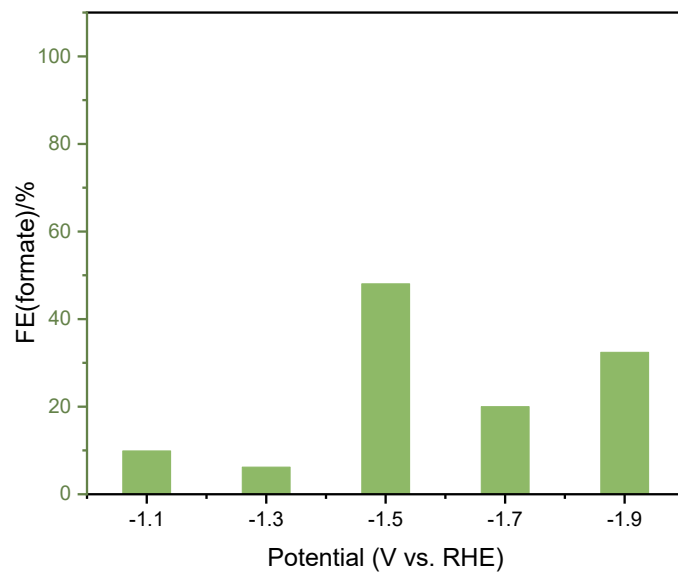

**Figure S12.** FE(formate) of commercial  $\text{In}_2\text{O}_3$ .

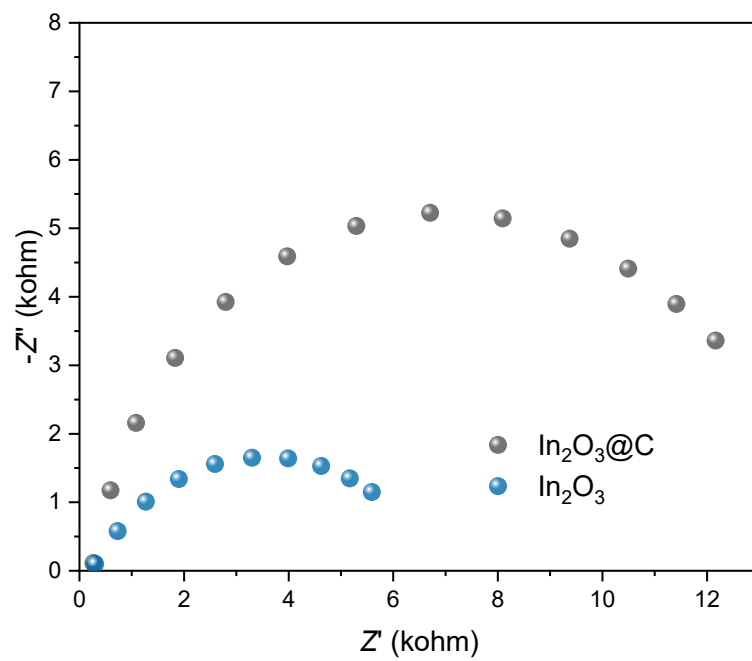

**Figure S13** EIS spectra of  $\text{In}_2\text{O}_3$  and  $\text{In}_2\text{O}_3@\text{C}$  catalysts.

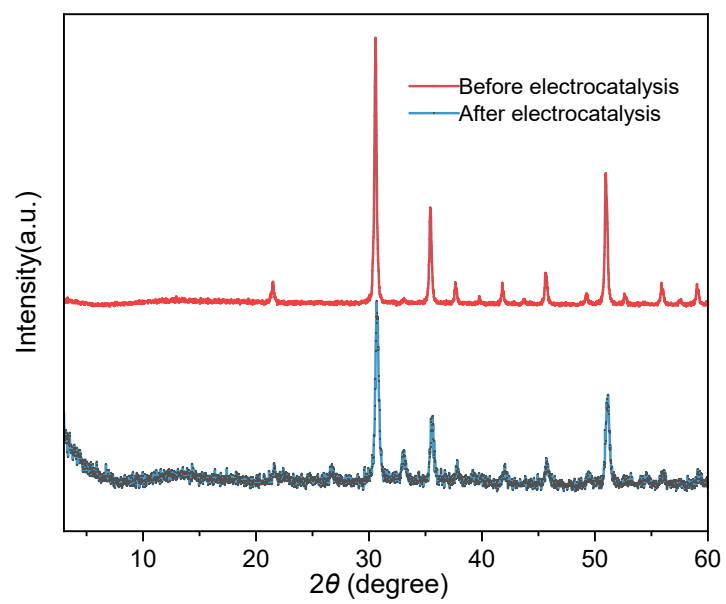

**Figure S14.** PXRD patterns of In<sub>2</sub>O<sub>3</sub>@C before and after electrocatalysis.

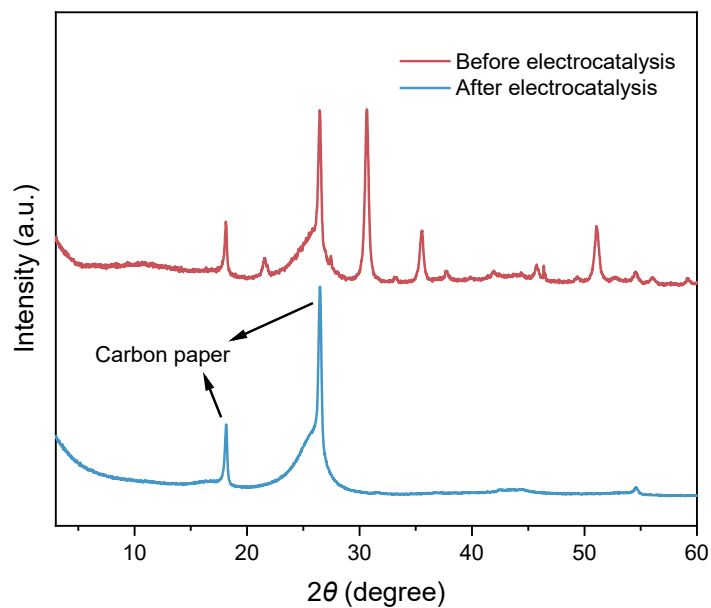

**Figure S15.** PXR D patterns of carbon paper loaded with commercial  $\text{In}_2\text{O}_3$  before and after electrocatalysis. Note that most of  $\text{In}_2\text{O}_3$  powder dissolved in 1 M KOH aqueous solution, no catalyst solid can be collected after electrolysis. Therefore, the gas diffusion electrodes before and after electrolysis were directly used for the collection of PXR D patterns.

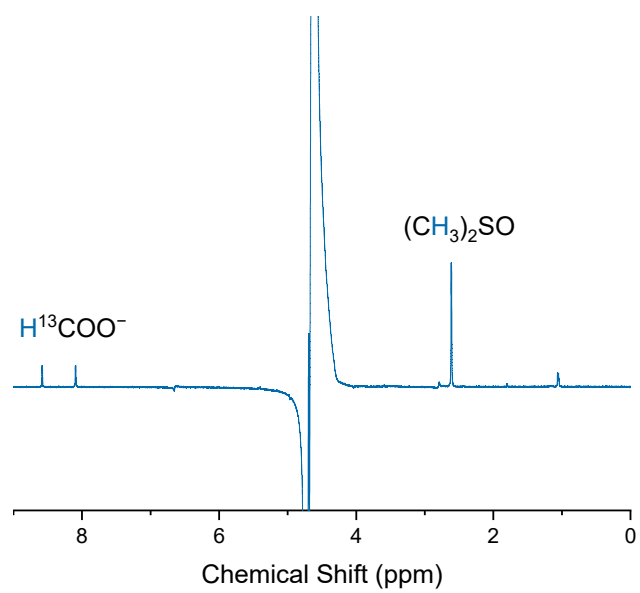

**Figure S16.**  $^1\text{H}$  NMR spectra of liquid products for e $\text{CO}_2\text{RR}$  by  $\text{In}_2\text{O}_3@\text{C}$  catalyst under  $^{13}\text{CO}_2$ .

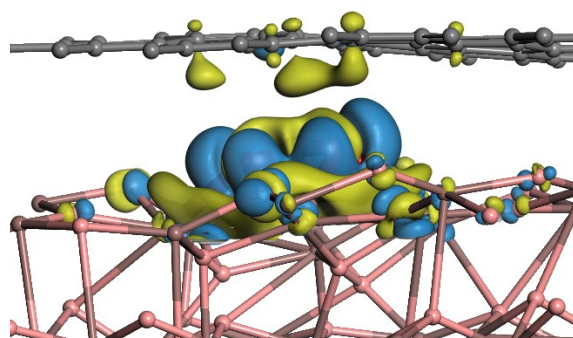

**Figure S17.** Differential charge density mapping of the \*OCHO intermediate.

**Table S1.** ICP-AES results of electrolyte.

| Catholyte           | Concentration of In (mg L <sup>-1</sup> ) |
|---------------------|-------------------------------------------|
| before electrolysis | -0.025                                    |
| after electrolysis  | -0.029                                    |

The negative value refers to that no indium detected.

**Table S2.** Performance comparison of electrocatalytic formate synthesis.

| Catalyst                                                       | Electrolyte            | Potential (V vs. RHE) | FE(formate) (%) | Current density (mA cm <sup>-2</sup> ) | Stability (h) | Ref.      |
|----------------------------------------------------------------|------------------------|-----------------------|-----------------|----------------------------------------|---------------|-----------|
| In <sub>2</sub> O <sub>3</sub> @C                              | 1 M KOH                | -1.9                  | 85              | 833                                    | 110           | This work |
| In <sub>2</sub> O <sub>3</sub> /Bi <sub>2</sub> O <sub>3</sub> | 1 M KOH                | -0.7                  | 93              | 3                                      | 30            | 1         |
| In/In <sub>2</sub> O <sub>3</sub>                              | 1 M KOH                | -0.6                  | 94              | 100                                    | 13            | 2         |
| In <sub>2</sub> O <sub>3</sub> /CZ-r                           | 1 M KOH                | -1.2                  | 100             | 80                                     | 60            | 3         |
| In <sub>2</sub> O <sub>3</sub> -C                              | 1 M KOH                | -1.2                  | 85              | 200                                    | 15            | 4         |
| Ni-In <sub>2</sub> O <sub>3</sub> @C NFs                       | 1 M KOH                | -0.8                  | 86              | 350                                    | 55            | 5         |
| In <sub>2</sub> O <sub>3</sub> @C                              | 1 M KOH                | -1.1                  | 94              | 70                                     | 9             | 6         |
| In <sub>2</sub> O <sub>3</sub>                                 | 1 M KOH                | -0.7                  | 85              | 90                                     | 18            | 7         |
| In <sub>2</sub> O <sub>3</sub>                                 | 0.1M KHCO <sub>3</sub> | -1.3                  | 85              | 18                                     | 80            | 8         |

## References

1. Y. Wang, H. Jiang, Z. Guo, H. Ma, S. Wang, H. Wang, S. Song, J. Zhang, Y. Yin, H. Wu, Z. Jiang and M. D. Guiver, *Energy Environ. Sci.*, 2023, **16**, 53-75.
2. B. Wulan, X. Cao, D. Tan, J. Ma and J. Zhang, *Adv. Funct. Mater.*, 2022, **33**, 2209114.
3. R. Qi, M. Liang, Z. Miao, H. Xu, Y. Fan, J. Mu, W. Feng, L. Diao, J. Zhou, X. Li and T. Ma, *Adv. Funct. Mater.*, 2025, DOI: 10.1002/adfm.202510948, e10948.
4. W. Wang, X. Wang, Z. Ma, Y. Wang, Z. Yang, J. Zhu, L. Lv, H. Ning, N. Tsubaki and M. Wu, *ACS Catal.*, 2022, **13**, 796-802.
5. Z. Chen, G. Yu, B. Li, X. Zhang, M. Jiao, N. Wang, X. Zhang and L. Liu, *ACS Catal.*, 2021, **11**, 14596-14604.
6. Z. Wang, Y. Zhou, D. Liu, R. Qi, C. Xia, M. Li, B. You and B. Y. Xia, *Angew. Chem. Int. Ed.*, 2022, **61**, e202200552.
7. Y. Li, Z. Xu, Q. Guo, Q. Li and R. Liu, *J. Energy Chem.*, 2025, **101**, 474-484.
8. Q. Cheng, M. Huang, L. Xiao, S. Mou, X. Zhao, Y. Xie, G. Jiang, X. Jiang and F. Dong, *ACS Catal.*, 2023, **13**, 4021-4029.
